# Supplementary material
Source: MDPI journal article supplement (https://www.mdpi.com/2504-2289/6/1/20)
Supplement: s1 [file s1]

## Supplementary Material

This document contains the supplementary materials for “Person Re-Identification via Pyramid Multipart Features and Multi-attention Framework”.

Here we present samples of the used dataset query tracklets and how our PMP Multi-Attention found the correct match mostly as Rank1 in simple/moderate examples and not far from the first 10 Ranks for the Hard examples.

The first two tables are over the Prid2011 dataset showing multiple moderate and hard examples respectively. The second two tables are over the iLIDS-VID dataset showing also moderate and hard examples. You will find that Rank1 has retrieved the correct pedstrain. It is noticed that Rank2 and Rank3 are similar to query tracklet. The full accuracy percentage can be found in the main manuscript Tables 2 and 3.

**Table S1.** PRID Dataset, simple-moderate examples.

| Query/Result Tracklet                                                                | Rank                |
|--------------------------------------------------------------------------------------|---------------------|
|   | Query 1 (Q1)        |
|  | Q1 Rank1<br>Correct |
|  | Q1 Rank2            |
|  | Q1 Rank3            |

Table S1. Continued.

| Query/Result Tracklet                                                                | Rank                |
|--------------------------------------------------------------------------------------|---------------------|
|    | Query 2 (Q2)        |
|    | Q2 Rank1<br>Correct |
|   | Q2 Rank2            |
|  | Q2 Rank3            |

Table S1. Continued.

| Query/Result Tracklet                                                                | Rank                |
|--------------------------------------------------------------------------------------|---------------------|
|    | Query 3 (Q3)        |
|    | Q3 Rank1<br>Correct |
|   | Q3 Rank2            |
|  | Q3 Rank3            |

Table S1. Continued.

| Query/Result Tracklet                                                                | Rank                |
|--------------------------------------------------------------------------------------|---------------------|
|    | Query 4 (Q4)        |
|    | Q4 Rank1<br>Correct |
|   | Q4 Rank2            |
|  | Q4 Rank3            |

Table S2. PRID Dataset, Hard Example.

| Query Images                                                                         | RANK                |
|--------------------------------------------------------------------------------------|---------------------|
|    | Query 1 (Q1)        |
|    | Q1 Rank1            |
|   | Q1 Rank2<br>Correct |
|  | Q1 Rank3            |



**Table S3.** iLIDS-VID Dataset, Rank1 is the correct matching tracklet.

| Query Tracklet                                                                       | Rank                |
|--------------------------------------------------------------------------------------|---------------------|
|    | Query 1 (Q1)        |
|    | Q1 Rank1<br>Correct |
|   | Q1 Rank2            |
|  | Q1 Rank3            |

Table S3. Continued.

| Query Tracklet                                                                       | Rank                |
|--------------------------------------------------------------------------------------|---------------------|
|    | Query 2             |
|    | Q2 Rank1<br>Correct |
|   | Q2 Rank2            |
|  | Q2 Rank3            |

Table S3. Continued.

| Query Tracklet                                                                       | Rank                |
|--------------------------------------------------------------------------------------|---------------------|
|    | Query 3 (Q3)        |
|    | Q3 Rank1<br>Correct |
|   | Q3 Rank2            |
|  | Q3 Rank3            |



Table S3. Continued.

| Query Tracklet                                                                       | Rank                |
|--------------------------------------------------------------------------------------|---------------------|
|    | Query 4 (Q4)        |
|    | Q4 Rank1<br>Correct |
|   | Q4 Rank2            |
|  | Q4 Rank3            |

Table S4. iLIDS-VID Dataset (Hard Example).

| Query Images                                                                         | Rank                |
|--------------------------------------------------------------------------------------|---------------------|
|    | Query 1 (Q1)        |
|    | Q1 Rank1            |
|   | Q2 Rank2            |
|  | Q3 Rank3<br>Correct |

Table S4. Continued.

| Query Images                                                                         | Rank                |
|--------------------------------------------------------------------------------------|---------------------|
|    | Query 2 (Q2)        |
|    | Q2 Rank 1           |
|   | Q2 Rank2<br>Correct |
|  | Q2 Rank3            |

Table S4. Continued.

| Query Images                                                                         | Rank                |
|--------------------------------------------------------------------------------------|---------------------|
|    | Query 3 (Q3)        |
|    | Q3 Rank1            |
|   | Q3 Rank2            |
|  | Q3 Rank6<br>Correct |
